# Supplementary material
Source: MDPI journal article supplement (https://www.mdpi.com/2306-5710/4/4/72)

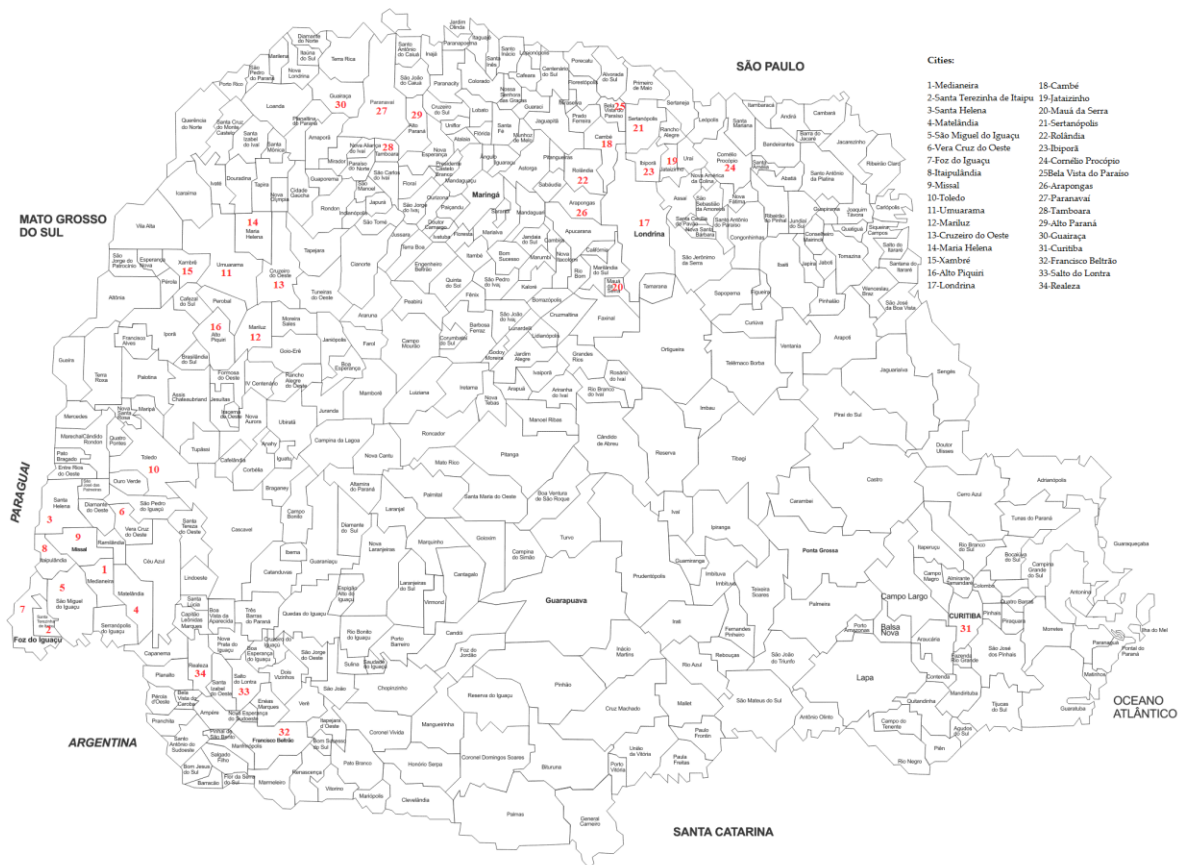

**Figure S1.** Location of the cities of origin of the study participants.

Supplement: s1 [file s1]
